# Supplementary material for: A double fluorescent nanoprobe based on phosphorus/nitrogen co-doped carbon dots for detecting dichromate ions and dopamine
Source: Royal Society of Chemistry journal article supplement (doi:10.1039/c8ra06120c), 2018-01-01
Supplement: c8ra06120c1.pdf [file c8ra06120c1.pdf]

## Supporting information

A double fluorescent nanoprobe based on phosphorus/nitrogen co-doped carbon dots for detecting dichromate ion and dopamine †

Bin Wu,<sup>ab</sup> Xiaofeng Shi,<sup>a</sup> Wei Han,<sup>a</sup> Taishan Wang,<sup>a</sup> Chunru Wang,<sup>a</sup> and Li Jiang<sup>\*ab</sup>

<sup>a</sup> CAS Key Laboratory of Molecular Nanostructure and Nanotechnology, CAS Research/Education Center for Excellence in Molecular Sciences, Institute of Chemistry, Chinese Academy of Sciences (CAS), Beijing 100190, P. R. China. E-mail: jiangli@iccas.ac.cn

<sup>b</sup> University of Chinese Academy of Sciences, Beijing 100049, P. R. China

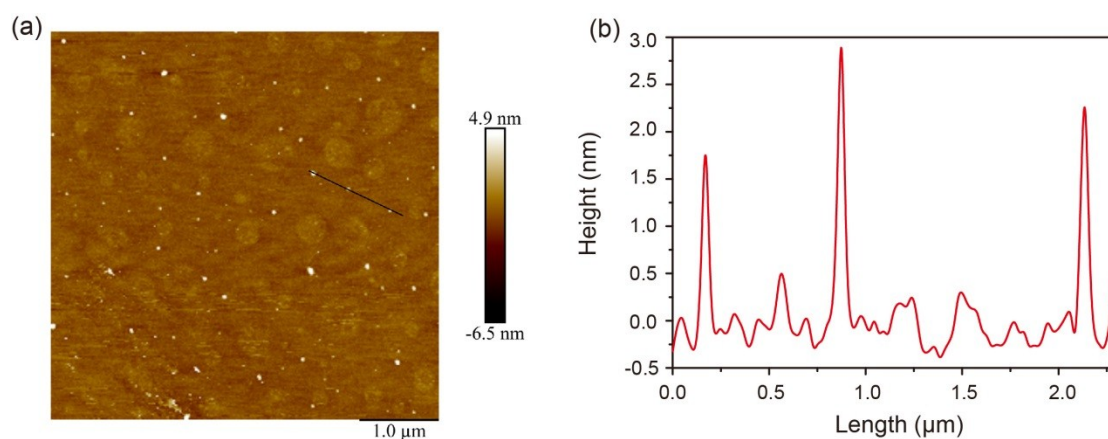

**Fig.S1. (a) AFM image of PNCDs. (b) height profile of PNCDs**

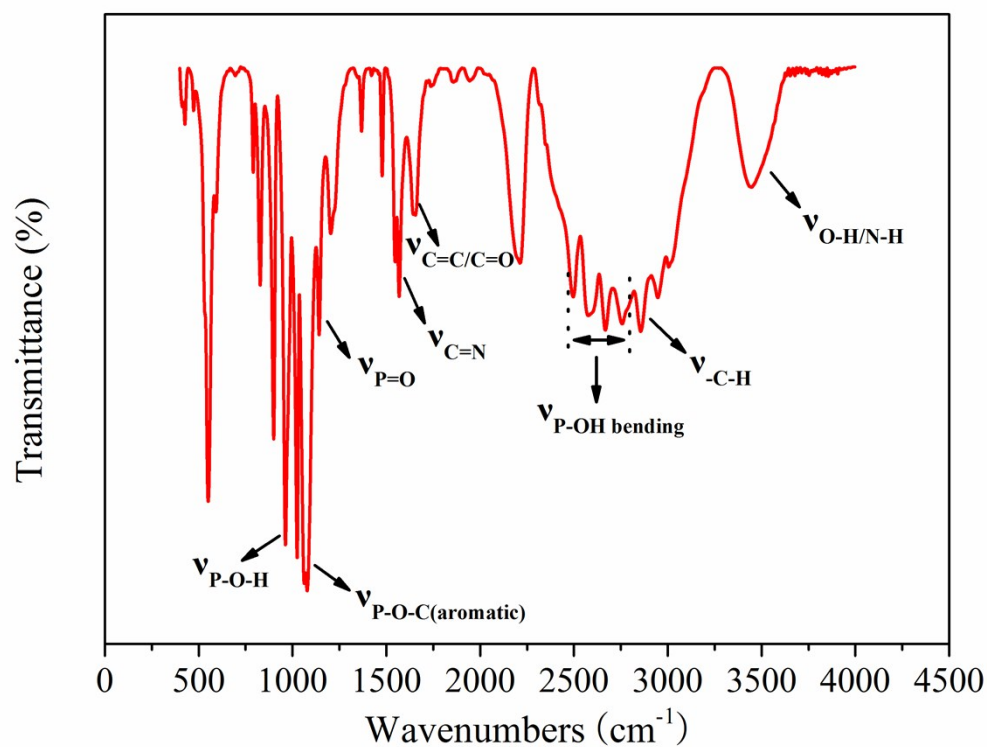

**Fig.S2. FTIR spectra of PNCDs.**

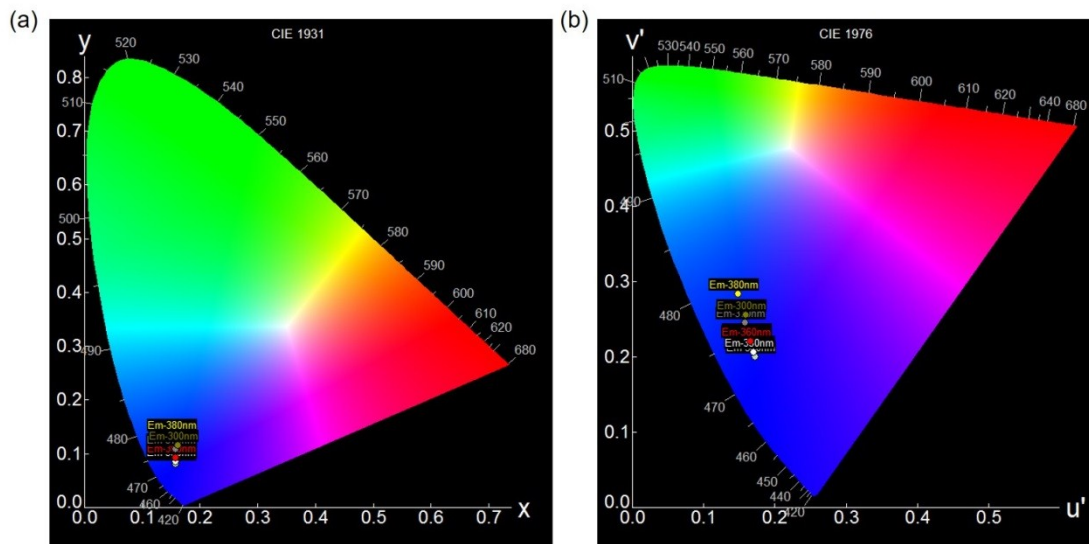

**Fig.S3. (a) CIE co-ordinate map 1931 of PNCDs with different excitation wavelengths. (b) CIE co-ordinate map 1976 of PNCDs with different excitation wavelengths.**

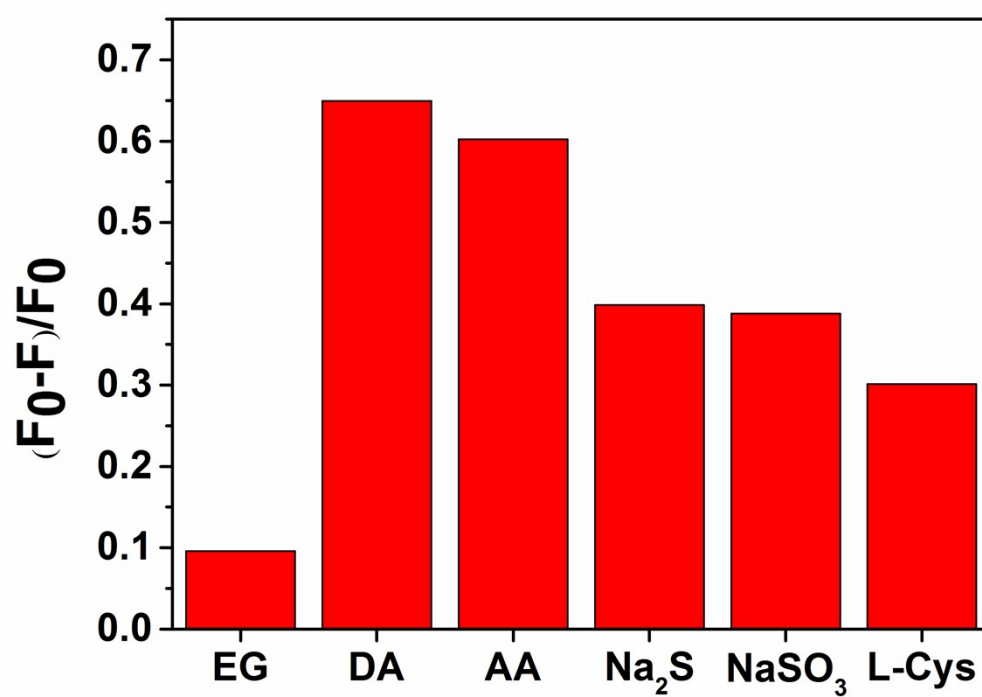

*Fig.S4.  $(F_0-F)/F_0$  of the PNCDs in PBS (pH: 7.4) with 160  $\mu$ M different reducing substances.  $F$  and  $F_0$  correspond to the fluorescence intensities of the PNCDs without and with 160  $\mu$ M of different reducing substances.*

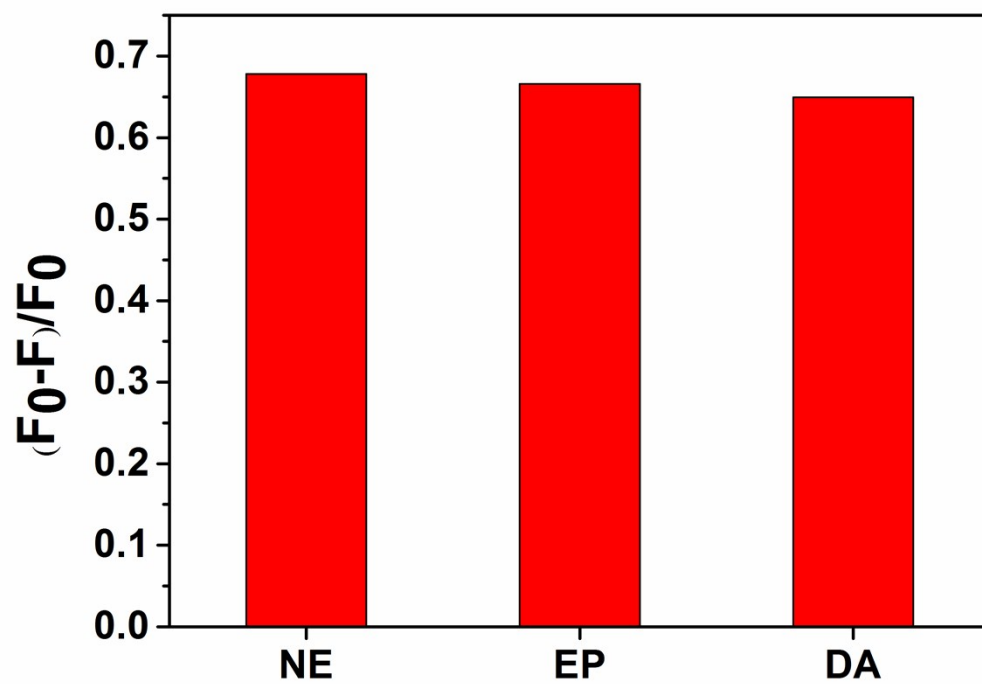

**Fig.S5.**  $(F_0-F)/F_0$  of the PNCDs in PBS (pH: 7.4) with 160  $\mu\text{M}$  analogues of dopamine.  $F$  and  $F_0$  correspond to the fluorescence intensities of the PNCDs without and with 160  $\mu\text{M}$  of two kinds of analogues of dopamine.

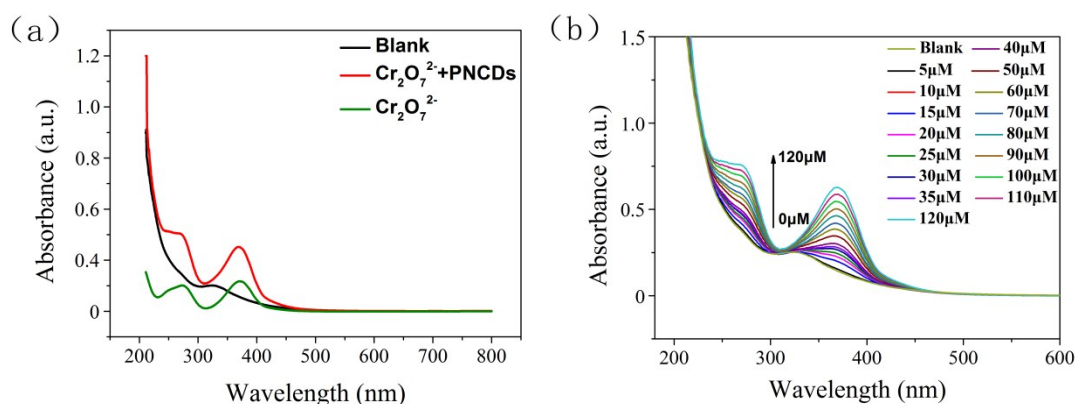

**Fig.S6.** (a) UV-vis spectra of the PNCDs, PNCDs/ $\text{Cr(VI)}$ , and  $\text{Cr(VI)}$  solution. (b) UV-vis spectra of the PNCDs with different concentrations of  $\text{Cr(VI)}$  (0  $\mu\text{M}$ —120  $\mu\text{M}$ )

The UV-vis spectra of the PNCDs, PNCDs/  $\text{Cr(VI)}$ , and  $\text{Cr(VI)}$ , shown in Fig. S4a, After the addition of  $\text{Cr(VI)}$ , Fig. S4a exhibited two peaks at 370 nm and 273nm which are characteristic of  $\text{Cr(VI)}$  species, on the contrary, absorption peak of PNCDs disappeared. With the increase of concentration of  $\text{Cr(VI)}$ , ultimately, absorption peak of PNCDs/ $\text{Cr(VI)}$  completely turns into the absorption peak of  $\text{Cr(VI)}$ . In the process, new absorption peak is not explored, which suggests that no complex formation or energy transfer is existent. Thereby definite IFE is the only possible dominated reason for the fluorescence quenching of PNCDs induced by  $\text{Cr(VI)}$ .

In order to further prove this design, we conduct the different concentrations of  $\text{Cr(VI)}$  and monitor the absorption changes of PNCDs with UV-vis spectra in Fig.S4b. With the increases of concentration of

Cr(VI) from 0 to 120  $\mu\text{M}$ , the absorptions caused by Cr(VI) around 273nm and 370 nm are increased, respectively. Finally, absorption peak of PNCDs-180 completely turns into the absorption peak of Cr(VI) without any appearance of new absorption peak which is a signal of complex formation or occurrence of chemical reaction. The phenomenon demonstrates the rationality of IFE based fluorescence quenching.

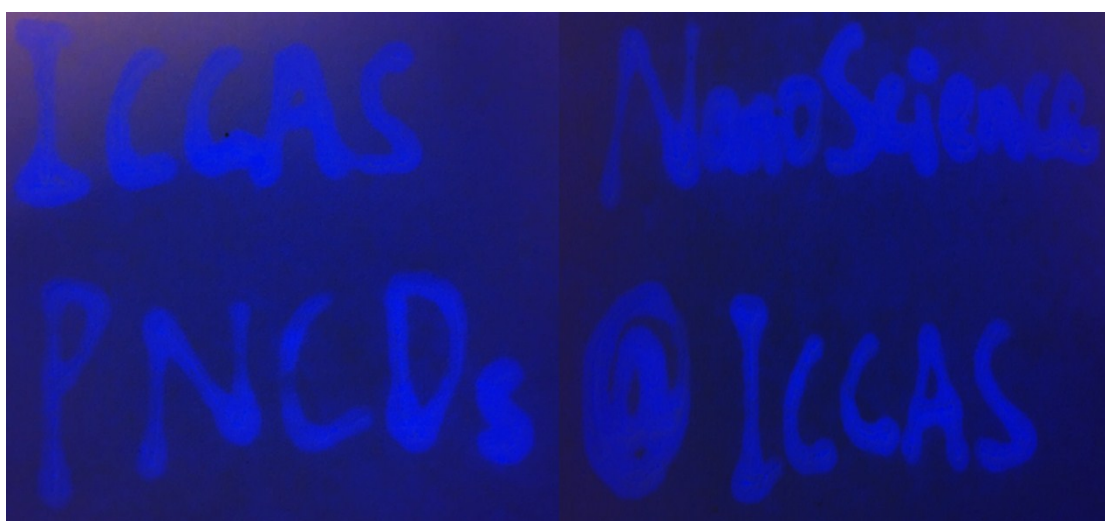

*Fig.S7. the hand written name of the corresponding address and carbon nanoparticles using fluorescent PNCDs coated filter paper under UV light excitation.*

In view of the good optical property and chemical durability of PNCDs, we have also employed the highly fluorescent PNCDs as a fluorescent ink for display purposes. The PNCDs aqueous solutions can be used as a new type of fluorescent ink. The aqueous solution of PNCDs was directly injected into a pen without any chemical modification. The name of the carbon dots and the workplace's name of author written on filter paper excited using a UV lamp is visible to the naked eye and readily flow while writing without any leakage and coagulation within the pen in

Fig.S5. The carbon dots based fluorescent ink doesn't contaminate nib and tube of fountain pen and can be easily washed off from water. Moreover, the resulting water soluble PNCDs ink is clear, permanent, pollution free, biocompatible and easily washable. Therefore, PNCDs ink might be an alternative and potential for fluorescent pens.
